# Supplementary material for: Process-oriented models of autumn leaf phenology: ways to sound calibration and implications of uncertain projections
Source: Copernicus journal article supplement (doi:10.5194/gmd-16-7171-2023), 2023-12-11
Supplement: Supplementary file 4 [file gmd-16-7171-2023-supplement.zip]

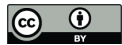

## *Supplement of*

# **Process-oriented models of autumn leaf phenology: ways to sound calibration and implications of uncertain projections**

**Michael Meier and Christof Bigler**

*Correspondence to:* Michael Meier ([michael.meier@cefe.cnrs.fr](mailto:michael.meier@cefe.cnrs.fr))

- [gmd-16-7171-2023-supplement-title-page.pdf](#)
- [Meier2023\\_SupplementS1\\_ProcessOrientedModelsOfAutumnLeafPhenology.pdf](#)
- [Meier2023\\_SupplementS2\\_ProcessOrientedModelsOfAutumnLeafPhenology.pdf](#)
- [Meier2023\\_SupplementS3\\_ProcessOrientedModelsOfAutumnLeafPhenology.pdf](#)
- [Meier2023\\_SupplementS4\\_ProcessOrientedModelsOfAutumnLeafPhenology.pdf](#)
- [Meier2023\\_SupplementS5\\_ProcessOrientedModelsOfAutumnLeafPhenology.pdf](#)
- [Meier2023\\_SupplementS6\\_ProcessOrientedModelsOfAutumnLeafPhenology.pdf](#)

The copyright of individual parts of the supplement might differ from the article licence.
