# Supplementary material for: Process-oriented models of autumn leaf phenology: ways to sound calibration and implications of uncertain projections
Source: Copernicus journal article supplement (doi:10.5194/gmd-16-7171-2023), 2023-12-11
Supplement: Supplementary file 5 [file gmd-16-7171-2023-supplement.zip]

## **Process-oriented models of autumn leaf phenology: ways to sound calibration and implications of uncertain projections**

Michael Meier, Christof Bigler

<https://doi.org/10.5194/gmd-16-1-2023-supplement>

Correspondence to: Michael Meier ([michael.meier@cefe.cnrs.fr](mailto:michael.meier@cefe.cnrs.fr))

### **S1 Daily drivers of the senescence rate**

The senescence rate in all models that we evaluated either depends on daily minimum temperature [°C] and, except for the CDD model, on day length [h]. Daily minimum temperature was taken directly from the corresponding climate datasets (GLDAS and CRODEX; Rodell et al., 2004; Jacob et al., 2014), while day length ( $L$ ; [h]) was approximated from latitude ( $LAT$ ; [°]) and the day of year ( $DOY$ ; [doy]; e.g. 32 for February 2) according to Brock (1981, p. 4):

$$L = \left(24[h]/180^\circ\right) \times \cos^{-1} \left\{ -\tan(LAT) \times \tan \left[ 23.45^\circ \times \sin \left( 360^\circ \times (284 + DOY)/365 \right) \right] \right\}$$

Eq. S1

### **S2 Seasonal drivers of the threshold for the senescence rate**

The threshold value is either a constant or depends linearly on one or two of the following seasonal drivers: the timing of spring phenology in the current year, the mean temperature or low precipitation index ( $LPI$ ) of the typical growing season or leafy season, the current growing season index ( $GSI$ ), or the accumulated net photosynthetic rate ignoring or considering water limitation constraints ( $A_{net}$  or  $A_{net-w}$ ) during the current growing season. These drivers were calculated from the minimum, mean, and maximum air temperature, net short- and longwave radiation, downwelling shortwave radiation, precipitation, and soil moisture as well as plant-available water capacity, atmospheric  $CO_2$  concentration, leaf area index and plant functional type (cf. Supplement S1). We calculated driver values according to Eqs. S2–S42 and either applied directly or as site-specific anomalies (in the SIAM, SIAM<sub>Za20</sub>, PIA<sub>GSI</sub>, PIA<sup>+</sup>, and PIA<sup>−</sup> models), depending on the model. Furthermore, all driver values except for the spring phenology depend on the period for which they are calculated. This period was either from observed spring to average autumn phenology per site and species (average temperature,  $LPI_{Za20}$ ,  $GSI$ ,  $A_{net}$ , and  $A_{net-w}$  for the TDM<sub>Za20</sub>, PDM<sub>Za20</sub>, TPDM<sub>Za20</sub>, PIA<sub>GSI</sub>, PIA<sup>+</sup>, and PIA<sup>−</sup> models) or from observed spring phenology to the first day of the accumulation period ( $d_1$ ; average temperature and  $LPI$  for the TDM1, PDM1, TPDM1, TM2, PDM2, TPDM2 models).

#### **S2.1 Low precipitation index and adapted low precipitation index**

The models by Liu et al. (2019) base their threshold value on the average temperature (TDM1, TDM2, TPDM1, and TPDM2 model) and/or the low precipitation index ( $LPI$ ; PDM1, PDM2, TPDM1, and TPDM2 model) for the leafy

season, i.e. the period from observed spring phenology to the starting day of the accumulation of the senescence rate ( $d_l$ ; Supplement S2: Eq. S2). The  $LPI$  corresponds to the mean number of low precipitation events [ $\in (0, 1)$ ], defined as  $\geq 7$  consecutive days without rain, between spring phenology ( $d_{SP}$ ; [doy]) and the first day of the accumulation period for the senescence rate ( $d_l$ ; [doy]; fitted during model calibration):

$$LPI = \overline{\sum_{l=d_{SP}}^{d_l} LPI_l}$$

Eq. S2

Zani et al. (2020) adapted both, the calculations of the average temperature and of the  $LPI$ , for the temperature and/or precipitation dependent models by Zani et al. (2020) (i.e.  $TDM_{Za20}$ ,  $PDM_{Za20}$ , and  $TPDM_{Za20}$ ). The corresponding periods were defined to last from the observed spring phenology to the site-specific average autumn phenology. Moreover, the low precipitation index was altered by Zani et al. (2020) and further adapted for this study, corresponding to the number of days with less than 2 mm of precipitation during the three driest periods of 30 consecutive days, hence denoted  $LPI_{Za20}$ . In contrast, Zani et al. (2020) based this index on the precipitation during the three driest months within the month of observed spring phenology to the month of the site-specific average autumn phenology.

## S2.2 Growing season index

In the  $PIA_{GSI}$  model, the threshold value depends on the anomaly of the growing season index ( $GSI$ ) per site (Jolly et al., 2005, Eq. 3; Zani et al., 2020). Daily  $GSI$  values were accumulated between observed spring phenology and the site-specific average autumn phenology. The daily index values are the product of a function of the mean temperature [ $^{\circ}C$ ]  $f(T_i)$ , the vapor pressure deficit [Pa]  $f(VPD_i)$ , and the day length [h]  $f(L_i)$  of day  $i$ . Both, accumulation period as well as  $f(T_i)$ ,  $f(VPD_i)$ , and  $f(L_i)$  were based on Zani et al. (2020, Eqs. S10–S15 and S36–S42) and Zani et al. (2021).

$$GSI = \sum_{i=d_{SP}}^{d_{L_i} < 11h} GSI_i$$

Eq. S3

$$GSI_i = f(T_i) \times f(VPD_i) \times f(L_i)$$

Eq. S4

$$f(T_i) = \frac{1}{1 + e^{k_1(k_2 - T_i)}} \times (1 - 0.01 \times e^{k_3(T_i - x_3)})$$

Eq. S5

$$k_1 = 2 \frac{\log(1/0.99 - 1)}{x_1 - x_2}$$

Eq. S6

$$k_2 = \frac{x_1 + x_2}{2}$$

Eq. S7

$$k_3 = \log\left(\frac{0.99/0.01}{x_4 - x_3}\right)$$

Eq. S8

$$f(VPD_i) = \begin{cases} 0 & , \quad VPD \geq VPD_{max} \\ 1 - \frac{VPD_i - VPD_{min}}{VPD_{max} - VPD_{min}} & , \quad VPD_{max} > VPD > VPD_{min} \\ 1 & , \quad VPD \leq VPD_{min} \end{cases}$$

Eq. S9

$$f(L_i) = \begin{cases} 0 & , \quad L_i \leq L_{min} \\ \frac{L_i - L_{min}}{L_{max} - L_{min}} & , \quad L_{min} < L_i < L_{max} \\ 1 & , \quad L_i \geq L_{max} \end{cases}$$

Eq. S10

Here,  $f(T_i)$  ranges from 0 to 1 and the values for  $x_1$ ,  $x_2$ ,  $x_3$ , and  $x_4$  are 1, 18, 25, and 45 °C, respectively.  $VPD_{min}$  and  $VPD_{max}$  were set to 900 and 4100 Pa, respectively.  $L_{min}$  and  $L_{max}$  were set to the maximum day length during the observed growing season per site and year and to 11 h, respectively. Daily mean temperature ( $T_i$ ) and day length ( $L_i$ ) were taken directly from the climate data and derived directly from the latitude and day of year (Eq. S1). However, daily vapor pressure deficit ( $VPD_i$ ; [Pa]) was derived from daily saturation vapor pressure ( $e_{si}$ ; [Pa]) and actual vapor pressure ( $e_{ai}$ ; [Pa]), which we approximated by functions of daily minimum and maximum temperature and by substituting dew point temperature by minimum temperature (Sadler and Evans, 1989; Table 1.8; Allen et al., 1998, Eqs. 11, 12, 14, and 48; Jones, 2013, Eqs. 5.15 and 5.16).

$$VPD_i = e_{si} - e_{ai}$$

Eq. S11

$$e_{si} = (e_{Tx_i} + e_{Tn_i})/2$$

Eq. S12

$$e_{ai} = e_{Tn_i}$$

Eq. S13

$$e_{Tj_i} = 611.21 \times e^{[(18.678 - Tj_i/234) \times Tj_i]/(257.14 + Tj_i)}$$

Eq. S14

Here,  $e_{Tj_i}$  is the vapor pressure [Pa] at temperature  $Tj$  [°C] of day  $i$ , with  $Tj$  being either daily maximum or minimum temperature ( $Tx$  or  $Tn$ , respectively).

### S2.3 Accumulated net photosynthetic rate

The threshold values of the  $PIA^+$  and  $PIA^-$  models are both driven by net photosynthesis, ignoring and considering water limitation constraints, respectively ( $A_{net}$  and  $A_{net-w}$ ; [mol m<sup>-2</sup>]; Zani et al., 2020).  $A_{net}$  and  $A_{net-w}$  were accumulated

between observed spring phenology and the site-specific average autumn phenology. They are based on net photosynthesis. This change can be calculated by deducting daytime respiration from gross photosynthesis ( $A_{gd}$ ; [mol m<sup>-2</sup>]), which may also be referred to as light respiration and real photosynthesis, respectively (Egle, 1960; Wohlfahrt and Gu, 2015).  $A_{gd}$  is limited by photon availability, Rubisco activity, and sink capacity (Farquhar et al., 1980; Kirschbaum and Farquhar, 1984; Collatz et al., 1991). It can be expressed as  $\min(J_E, J_C, J_S)$ , with  $J_E$ ,  $J_C$ , and  $J_S$  being the respective rates depending on light, Rubisco activity, and sink capacity (Collatz et al., 1991, Eq. A.1):

$$A_{gd_i} = L_i \times \frac{J_{P_i} + J_{S_i} - \sqrt{(J_{P_i} + J_{S_i})^2 - 4\beta J_{P_i} J_{S_i}}}{2\beta}$$

Eq. S15

and

$$J_{P_i} = \frac{J_{E_i} + J_{C_i} - \sqrt{(J_{E_i} + J_{C_i})^2 - 4\theta_{Co} J_{E_i} J_{C_i}}}{2\theta_{Co}}$$

Eq. S16

Here,  $J_P$ , which is an intermediate variable for the minimum of  $J_E$  and  $J_C$ .  $J_E$ ,  $J_C$ , and  $J_S$  are in [mol m<sup>-2</sup> h<sup>-1</sup>],  $L_i$  is the length of day  $i$  [h] (Eq. S1), and  $\beta$  and  $\theta_{Co}$  are two shaping parameters (Table S1; Collatz et al., 1991, Eqs. A.8 and A.9).

The daily photosynthetic rate depending on light ( $J_E$ ) was defined as

$$J_{E_i} = CI_i \times APAR_i / L_i$$

Eq. S17

with  $CI$  being the daily available fraction of the absorbed photosynthetically active radiation ( $APAR$ ; [mol m<sup>-2</sup>]) accumulated during day  $i$  (Haxeltine and Prentice, 1996, Eqs. 3 & 4; Sitch et al., 2000, Eq. 14). Daily  $APAR$  was derived from downward shortwave radiation as follows:

$$APAR_i = c_q \times \alpha_a \times f_{apar} \times PAR_i \times (24 \times 3600)[s] \quad \text{Eq. S18}$$

$$f_{apar} = 1 - e^{-0.5 \times LAI} \quad \text{Eq. S19}$$

$$PAR_i = 0.5R_{dsi} \quad \text{Eq. S20}$$

Here,  $PAR$  is the photosynthetically active radiation ( $[W\ m^{-2}]$ ),  $f_{apar}$  is the intercepted fraction of incoming PAR at ecosystem level, which was calculated from the corresponding leaf area index (LAI; Haxeltine and Prentice, 1996, Eq. 1; Sitch et al., 2000, Eq. 7),  $\alpha_a$  is the fraction of assimilated PAR from ecosystem to leaf level (Table S1), and  $c_q$  is the conversion factor for solar radiation at 550 nm  $[E\ J^{-1}]$  (i.e.  $[mol\ J^{-1}]$ ; Table S1; Sitch et al., 2000, Eq. 14; Smith, 2007, p. 9). PAR was estimated from the downwelling shortwave radiation ( $R_{ds}\ [W\ m^{-2}]$ ; Prentice et al., 1993, Eq. 12; Sitch et al., 2000, Eq. A.1) accumulated during day  $i$ .

The fraction  $C1$  depends on the daily internal partial pressure of  $CO_2$  ( $p_lCO_2$ ; [Pa]),  $CO_2$  condensation point ( $\Gamma^*$ ; [Pa]) and mean temperature ( $T$ ;  $[^\circ C]$ ), as well as on a parameter accounting for the decreasing maximum photosynthetic rate of conifer needles with age ( $\Phi_C$ ) and for the quantum efficiency of  $C_3$  plants ( $\alpha_{C3}$ ; Table S.C1; Haxeltine and Prentice, 1996, Eq. 4; Sitch et al., 2000, Eq. 15):

$$C1_i = \Phi_C \times \alpha_{C3} \times f(T_i) \times (p_lCO_{2i} - \Gamma_{*i}) / (p_lCO_{2i} + 2\Gamma_{*i}) \quad \text{Eq. S21}$$

We applied the same function of daily mean temperature  $f(T_i)$  as for the calculation of the  $GSI$  (Eq. S5). Further, the daily internal partial pressure of  $CO_2$  ( $p_lCO_2$ ) and the daily  $CO_2$  condensation point ( $\Gamma^*$ ) were derived according to

$$p_lCO_{2i} = \lambda_{C3} \times [CO_{2,A}]_i \times P_0 \quad \text{Eq. S22}$$

$$\Gamma_{*i} = p_A O_2 / 2\tau \times Q_{10,\tau}^{((T_i - 25)/10)} \quad \text{Eq. S23}$$

with  $\lambda_{C3}$  being the optimal ratio of internal to ambient  $[CO_2]$  of  $C_3$  plants (Table S1),  $[CO_{2,A}]$  being the ambient (i.e. atmospheric)  $[CO_2]$  of day  $i$ , and  $P_0$  being the atmospheric standard pressure [Pa] (Table S1; Collatz et al., 1991, Eqs. A3 & A12; Haxeltine and Prentice, 1996, Eq. 8). In addition,  $p_A O_2$  is the ambient partial pressure of  $O_2$  [Pa] (Table S1),  $\tau$  is the  $CO_2$  to  $O_2$  specificity ratio (Table 1),  $Q_{10,\tau}$  is the corresponding change for a temperature change of 10 K (Table S1), and  $T$  is the mean temperature  $[^\circ C]$  of day  $i$  (Haxeltine and Prentice, 1996, Eq. 7; Sitch et al., 2000, Eq. 18).

The daily photosynthetic rate depending on Rubisco activity ( $J_C$ ) was defined as

$$J_{Ci} = C2_i \times V_{max_i} / 24[\text{h}]$$

Eq. S24

with  $C2$  being the daily available fraction of the maximum photosynthetic rate ( $V_{max}$ ; [ $\text{mol m}^{-2}$ ]) accumulated during day  $i$ , divided by 24 hours (Haxeltine and Prentice, 1996, Eq. 5; Sitch et al., 2000, Eq. 20).

The daily fraction  $C2$  depended on the internal partial pressure of  $\text{CO}_2$  ( $p_i\text{CO}_2$ ), the  $\text{CO}_2$  condensation point ( $\Gamma^*$ ), the ambient partial pressure of  $\text{O}_2$  ( $p_A\text{O}_2$ ), the kinetic coefficients for  $\text{CO}_2$  ( $K_C$ ) and  $\text{O}_2$  ( $K_O$ ), and the daily mean temperature ( $T$  [ $^\circ\text{C}$ ]; Table S1; Collatz et al., 1991, Eq. A12; Haxeltine and Prentice, 1996, Eq. 6; Sitch et al., 2000, Eq. 21):

$$C2_i = \frac{p_i\text{CO}_{2i} - \Gamma^*_{*i}}{p_i\text{CO}_{2i} + K_{Ci} \left( 1 + p_A\text{O}_{2i} / K_{Oi} \right)}$$

Eq. S25

$$K_{Ci} = k_C \times Q_{10,k_C}^{((T_i-25)/10)}$$

Eq. S26

$$K_{Oi} = k_O \times Q_{10,k_O}^{((T_i-25)/10)}$$

Eq. S27

The maximum photosynthetic rate ( $V_{max}$ ) was calculated according to

$$V_{max_i} = \beta_{C_3}^{-1} \times (C1_i / C2_i) \times [(2\theta_{HP} - 1)s_i - (2\theta_{HP}s_i - C2_i)\sigma_i] \times APAR_i$$

Eq. S28

with  $\beta_{C_3}$  being the ratio of dark respiration to  $V_{max}$  of  $C_3$  plants and  $\theta_{HP}$  being a shaping parameter (Table S1; Haxeltine and Prentice, 1996, Eq. 11; Sitch et al., 2000, Eq. 25), whereas  $s$  and  $\sigma$  were derived from day length ( $L$ ) and the fractions  $C1$  and  $C2$  as follows (Haxeltine and Prentice, 1996, Eqs. 12 & 13; Sitch et al., 2000, Eq. 25):

$$s_i = \beta_{C_3} \times 24[\text{h}] / L_i$$

Eq. S29

$$\sigma_i = \sqrt{1 - C2_i - s_i / C2_i - \theta_{HP}s_i}$$

Eq. S30

The daily photosynthetic rate depending on sink capacity ( $J_s$ ) was defined as

$$J_{ci} = C2_i \times V_{max_i} / 24[\text{h}]$$

Eq. S31

From  $A_{gd}$ , we derived the daily daytime net photosynthetic rate unconstrained by water limitation ( $A_{net}$ ; [ $\text{mol m}^{-2}$ ]) by subtracting the daytime respiration ( $R_d$ ; [ $\text{mol m}^{-2}$ ]) from  $A_{gd}$  (Haxeltine and Prentice, 1996, Eq. 19; Sitch et al., 2000, Eq. 26):

$$A_{net_i} = A_{gd_i} - R_{d_i} \times L_i / 24[\text{h}]$$

Eq. S32

$$R_{d_i} = \beta_{C3} \times V_{max_i}$$

Eq. S33

While  $A_{net}$  depended on the daytime fraction of daily respiration ( $R_d$ ; [ $\text{mol m}^{-2}$ ]) and thus on day length ( $L$ ; [h]),  $R_d$  was derived from the maximum photosynthetic rate ( $V_{max}$ ; [ $\text{mol m}^{-2}$ ]) and the fraction of leaf respiration per maximum Rubisco capacity for C3 plants ( $\beta_{C3}$ ; Table S1; Haxeltine and Prentice, 1996, Eq. 10; Sitch et al., 2000, Eq. 24):

From  $A_{net}$ , we derived the daily daytime net photosynthetic rate constrained by water limitation ( $A_{net-w}$ ; [ $\text{mol m}^{-2}$ ]) by multiplying  $A_{net}$  with a factor for daily water stress ( $0 \leq w_d \leq 1$ ; Zani et al., 2020, Eq. S.34):

$$A_{net-w_i} = A_{net_i} \times w_{d_i}$$

Eq. S34

$$w_{d_i} = E_{S_i} / E_{D_i}$$

Eq. S35

Here,  $E_S$  is the abiotic, atmosphere and soil-controlled moisture supply [ $\text{mm d}^{-1}$ ] and  $E_D$  is the biotic, plant-controlled moisture demand [ $\text{mm d}^{-1}$ ] for day  $i$  (Prentice et al., 1993; Gerten et al., 2004; Zani et al., 2020, Eq. S.23).

While past climate data were available for four different soil layers, climate projection data were only available for the entire soil in one layer. Hence, we derived daily moisture supply ( $E_S$ ) by adapting the two-layer approach of Haxeltine and Prentice (1996, Eqs. 24 & 30) and Gerten et al. (2004, Eqs. 4 & 6) to one soil layer depth of 2 m:

$$E_{S_i} = \begin{cases} E_{max} \times (w_i / w_{max}) & ; \quad w_i < w_{max} \\ E_{max} & ; \quad w_i \geq w_{max} \end{cases}$$

Eq. S36

$$w_{max} = 2 \times 1000[\text{mm m}^{-1}] \times PAWC$$

Eq. S37

Here,  $E_{max}$  is the maximum transpiration rate ( $[\text{mm d}^{-1}]$ ; Table S1),  $w$  is the soil moisture content ( $[\text{mm}]$ ; for the soil layer depth of 0–2 m) of day  $i$ , and  $w_{max}$  is the corresponding plant-available water capacity  $[\text{mm}]$  according to site-specific volumetric plant-available water capacity ( $PAWC$ ,  $[\%]$ ).

Daily moisture demand ( $E_D$ ) was derived according to Gerten et al. (2004, Eq. 7), neglecting the fraction of daytime during which the canopy is wet, by

$$E_{D_i} = E_{q_i} \times \alpha_m / \left(1 + g_m / g_{pot_i}\right)$$

Eq. S38

with  $E_q$  being the daily equilibrium evapotranspiration rate  $[\text{mm d}^{-1}]$ ,  $\alpha_m$  being a maximum Priestley-Taylor coefficient (Table S1),  $g_m$  being a scaling conductance coefficient ( $[\text{mm s}^{-1}]$ ; Table S1), and  $g_{pot}$  being the potential canopy conductance  $[\text{mm s}^{-1}]$  for day  $i$ .

The daily equilibrium evapotranspiration rate ( $E_q$ ) depends on mean air temperature ( $T$ ;  $[\text{°C}]$ ) and net radiation (i.e. sum of net short- and longwave radiation with positive inward and negative outward fluxes;  $R_S$  and  $R_L$ , respectively;  $[\text{W m}^{-2}]$ ; Prentice et al., 1993, Eq. 5; Gerten et al., 2004, Eq. 1):

$$E_{q_i} = \frac{\Delta_i}{\Delta_i + \gamma} \times \frac{R_{S_i} + R_{L_i}}{L} \times (24 \times 3600)[\text{s d}^{-1}]$$

Eq. S39

$$\Delta_i = 2.503 \times 10^6 \times \frac{e^{17.269 \times T_i / (237.3 + T_i)}}{(237.3 + T_i)^2}$$

Eq. S40

Here,  $\Delta$  is the temperature depending rate of increase of the saturation vapor pressure ( $[\text{Pa K}^{-1}]$ ; Prentice et al., 1993, Eq. 6) of day  $i$ ,  $\gamma$  is a psychrometric constant ( $[\text{Pa K}^{-1}]$ ; Table S1),  $R_S$  and  $R_L$  are the net short- and longwave radiation  $[\text{W m}^{-2}]$ , respectively, and  $L$  is the latent heat of vaporization of water ( $[\text{J kg}^{-1}]$ ; Table S1).

The potential canopy conductance ( $g_{pot}$ ) of day  $i$  was derived from the daytime net photosynthetic product ( $A_{DT}$ ;  $[\text{kg C m}^{-2} \text{s}^{-1}]$ , Gerten et al., 2004, Eq. 8).

$$g_{pot_i} = g_{min} + \frac{1.6 A_{DT_i}}{[CO_{2,A}]_i \times (1 - \lambda_{c3})}$$

Eq. S41



$$A_{DT_i} = \frac{C_{mol}}{1000[\text{kg g}^{-1}]} \times A_{net_i}[\text{d}^{-1}]$$

Eq. S42

Here,  $g_{min}$  is the plant functional type specific minimum canopy conductance ( $[\text{mm s}^{-1}]$ ; Table S1),  $[CO_{2,A}]$  is the ambient  $[CO_2]$ ,  $\lambda_{C3}$  is the optimal ratio of internal to ambient  $[CO_2]$  of  $C_3$  plants (Table S1),  $C_{mol}$  is the molecular mass of carbon (i.e.  $12 \text{ g mol}^{-1}$ ), and  $A_{net}$  is the daytime net photosynthetic rate unconstrained by water limitation  $[\text{mol m}^{-2}]$ .

Table S1. Values and sources of constants applied to the calculation of accumulated apparent daily photosynthetic rates.

| Parameter      | Value                  | Unit                                                 | Description                                                                            | Source                              |
|----------------|------------------------|------------------------------------------------------|----------------------------------------------------------------------------------------|-------------------------------------|
| $\beta$        | 0.95                   | fraction                                             | co-limitation (shape) parameter                                                        | Co&.91, Eq. A9                      |
| $\theta_{Co}$  | 0.98                   | fraction                                             | co-limitation (shape) parameter                                                        | Co&.91, Eq. A8                      |
| $\alpha_a$     | 0.5                    | fraction                                             | ratio of assimilated PAR from ecosystem to leaf level                                  | Si&.00, Table 4                     |
| $c_q$          | $4.6 \times 10^{-6}$   | $[\text{E J}^{-1}]$<br>(i.e. $[\text{mol J}^{-1}]$ ) | conversion factor for solar radiation at 550 nm                                        | Si&.00, Table 4                     |
| $\Phi_C$       | 1.0 (TBL)<br>0.8 (TNL) | fraction                                             | parameter accounting for the decreasing maximum photosynthetic rate of leaves with age | H&P.96, Table 4                     |
| $\alpha_{C3}$  | 0.08                   | fraction                                             | intrinsic quantum efficiency of $CO_2$ uptake in $C_3$ plants                          | Co&.91, Table A1<br>H&P.96, Table 2 |
| $\lambda_{C3}$ | 0.8                    | fraction                                             | optimal ratio of internal to ambient $[CO_2]$ for $C_3$ plants                         | Ge&.04, Eq. 8, p. 254               |
| $P_0$          | $1.013 \times 10^5$    | $[\text{Pa}]$                                        | atmospheric standard pressure                                                          |                                     |
| $p_{AO_2}$     | $0.209 \times P_0$     | $[\text{Pa}]$                                        | partial ambient pressure of $O_2$                                                      | Co&.91, Table A1<br>H&P.96, Table 2 |
| $\tau$         | 2600                   | fraction                                             | kinetic parameter for the $CO_2$ to $O_2$ specificity ratio at 25 °C                   | Co&.91, Table A1<br>H&P.96, Table 2 |
| $Q_{10,\tau}$  | 0.57                   | fraction                                             | relative change in $\tau$ for a 10 K change in temperature                             | Co&.91, Table A1<br>H&P.96, Table 2 |
| $k_C$          | 30                     | $[\text{Pa}]$                                        | Michaelis constant for $CO_2$ at 25 °C                                                 | Co&.91, Table A1<br>H&P.96, Table 2 |
| $Q_{10,k_C}$   | 2.1                    | fraction                                             | relative change in $k_C$ for a 10 K change in temperature                              | Co&.91, Table A1<br>H&P.96, Table 2 |
| $k_O$          | $3 \times 10^4$        | $[\text{Pa}]$                                        | Michaelis constant for $O_2$ at 25 °C                                                  | Co&.91, Table A1<br>H&P.96, Table 2 |

Table S1. Continued.

|               |                        |                       |                                                           |                                               |
|---------------|------------------------|-----------------------|-----------------------------------------------------------|-----------------------------------------------|
| $Q_{10,kO}$   | 1.2                    | fraction              | relative change in $k_O$ for a 10 K change in temperature | Co&.91, Table A1<br>H&P.96, Table 2           |
| $\theta_{HP}$ | 0.7                    | fraction              | co-limitation (shape) parameter                           | M&W.93, Table 1<br>H&P.96, Table 2            |
| $\beta_{C3}$  | 0.015                  | fraction              | ratio of dark respiration to $V_{max}$ for $C_3$ plants   | Fa&.80, Table A1<br>H&P.96, Table 2           |
| $E_{max}$     | 5                      | [mm d <sup>-1</sup> ] | maximum evapotranspiration rate                           | Si&.03, Table 3<br>Ge&.04, Table 1            |
| $\alpha_m$    | 1.391                  | fraction              | a maximum Priestley-Taylor coefficient                    | Ge&.04, Eq. 7, p. 253                         |
| $g_m$         | 3.26                   | [mm s <sup>-1</sup> ] | scaling conductance coefficient                           | Ge&.04, Eq. 7, p. 253                         |
| $\gamma$      | 65                     | [Pa K <sup>-1</sup> ] | psychrometric constant                                    | Pr&.93, Eq. 5, p. 55<br>Ge&.04, Eq. 1, p. 253 |
| $L$           | $2.5 \times 10^6$      | [J kg <sup>-1</sup> ] | latent heat of vaporization of water                      | Pr&.93, Eq. 5, p. 55<br>Ge&.04, Eq. 1, p. 253 |
| $g_{min}$     | 0.5 (TBL)<br>0.3 (TNL) | [mm s <sup>-1</sup> ] | plant functional type specific minimum canopy conductance | Ge&.04, Table 1                               |

Note: Where indicated, constants are plant functional type specific and hence differ between temperate broad-leaved trees (TBL) and temperate needle-leaved trees (TNL). The abbreviations of the sources are Collatz et al. (1991; Co&.91), Farquhar et al. (1980; Fa&.80), Gerten et al. (2004; Ge&.04), Haxeltine and Prentice (1996; H&P.96), Mcmurtrie and Wang (1993; M&W.93), Prentice et al. (1993; Pr&.93), Sitch et al. (2000; Si&.00), Sitch et al. (2003; Si&.03), and Wong et al. (1979; Wo&.79).

## References

- Allen, R. G., Pereira, L. S., Raes, D., and Smith, M.: FAO Irrigation and drainage paper No. 56. Crop Evapotranspiration. Guidelines for computing crop water requirements, Food and Agriculture Organization of the United Nations, Rome, 300, 1998.
- Brock, T. D.: Calculating solar radiation for ecological studies, *Ecol. Model.*, 14, 1-19, 10.1016/0304-3800(81)90011-9, 1981.
- Collatz, G. J., Ball, J. T., Grivet, C., and Berry, J. A.: Physiological and environmental-regulation of stomatal conductance, photosynthesis and transpiration - A model that includes laminar boundary-layer, *Agricultural and Forest Meteorology*, 54, 107-136, 10.1016/0168-1923(91)90002-8, 1991.
- Egle, K.: Apparente und reelle Photosynthese, Gaswechselgleichgewicht, Lichtatmung, in: *Die CO<sub>2</sub>-Assimilation / The Assimilation of Carbon Dioxide: In 2 Teilen / 2 Parts*, edited by: Pirson, A., Springer Berlin Heidelberg, Berlin, Heidelberg, 182-210, 10.1007/978-3-642-94798-8\_10, 1960.
- Farquhar, G. D., Caemmerer, S. V., and Berry, J. A.: A biochemical model of photosynthetic CO<sub>2</sub> assimilation in leaves of  $C_3$  species, *Planta*, 149, 78-90, 10.1007/bf00386231, 1980.
- Gerten, D., Schaphoff, S., Haberlandt, U., Lucht, W., and Sitch, S.: Terrestrial vegetation and water balance - hydrological evaluation of a dynamic global vegetation model, *J. Hydrol.*, 286, 249-270, 10.1016/j.jhydrol.2003.09.029, 2004.
- Haxeltine, A. and Prentice, I. C.: BIOME3: An equilibrium terrestrial biosphere model based on ecophysiological constraints, resource availability, and competition among plant functional types, *Glob. Biogeochem. Cycle*, 10, 693-709, 10.1029/96gb02344, 1996.
- Jacob, D., Petersen, J., Eggert, B., Alias, A., Christensen, O. B., Bouwer, L. M., Braun, A., Colette, A., Deque, M., Georgievski, G., Georgopoulou, E., Gobiet, A., Menut, L., Nikulin, G., Haensler, A., Hempelmann, N., Jones, C., Keuler, K., Kovats, S., Kroner, N., Kotlarski, S., Kriegsmann, A., Martin, E., van Meijgaard, E., Moseley, C., Pfeifer, S., Preuschmann, S., Radermacher, C., Radtke, K., Rechid, D., Rounsevell, M., Samuelsson, P., Somot, S., Soussana,

- J. F., Teichmann, C., Valentini, R., Vautard, R., Weber, B., and Yiou, P.: EURO-CORDEX: new high-resolution climate change projections for European impact research, *Reg. Envir. Chang.*, 14, 563-578, 10.1007/s10113-013-0499-2, 2014.
- Jolly, W. M., Nemani, R., and Running, S. W.: A generalized, bioclimatic index to predict foliar phenology in response to climate, *Global Change Biology*, 11, 619-632, 10.1111/j.1365-2486.2005.00930.x, 2005.
- Jones, H. G.: *Plants and Microclimate: A Quantitative Approach to Environmental Plant Physiology*, 3, Cambridge University Press, Cambridge, DOI: 10.1017/CBO9780511845727, 2013.
- Kirschbaum, M. U. F. and Farquhar, G. D.: Temperature Dependence of Whole-Leaf Photosynthesis in *Eucalyptus pauciflora* Sieb. ex Spreng., *Australian Journal of Plant Physiology*, 11, 519-538, 10.1071/pp9840519, 1984.
- Liu, G., Chen, X. Q., Fu, Y. S., and Delpierre, N.: Modelling leaf coloration dates over temperate China by considering effects of leafy season climate, *Ecol. Model.*, 394, 34-43, 10.1016/j.ecolmodel.2018.12.020, 2019.
- McMurtrie, R. E. and Wang, Y. P.: Mathematical models of the photosynthetic response of tree stands to rising CO<sub>2</sub> concentrations and temperatures, *Plant Cell Environ.*, 16, 1-13, 10.1111/j.1365-3040.1993.tb00839.x, 1993.
- Prentice, I. C., Sykes, M. T., and Cramer, W.: A simulation-model for the transient effects of climate change on forest landscapes, *Ecol. Model.*, 65, 51-70, 10.1016/0304-3800(93)90126-D, 1993.
- Rodell, M., Houser, P. R., Jambor, U., Gottschalck, J., Mitchell, K., Meng, C. J., Arsenault, K., Cosgrove, B., Radakovich, J., Bosilovich, M., Entin, J. K., Walker, J. P., Lohmann, D., and Toll, D.: The global land data assimilation system, *Bull. Amer. Meteorol. Soc.*, 85, 381-394, 10.1175/bams-85-3-381, 2004.
- Sadler, E. J. and Evans, D. E.: Vapor-pressure deficit calculations and their effect on the combination equation, *Agricultural and Forest Meteorology*, 49, 55-80, 10.1016/0168-1923(89)90062-2, 1989.
- Sitch, S., Prentice, I. C., Smith, B., Cramer, W., Kaplan, J. O., Lucht, W., Sykes, M. T., Thonicke, K., and Venevsky, S.: LPJ - A Coupled Model Of Vegetation Dynamics And The Terrestrial Carbon Cycle. <https://www.researchgate.net/publication/37456884>, 2000.
- Sitch, S., Smith, B., Prentice, I. C., Arneth, A., Bondeau, A., Cramer, W., Kaplan, J. O., Levis, S., Lucht, W., Sykes, M. T., Thonicke, K., and Venevsky, S.: Evaluation of ecosystem dynamics, plant geography and terrestrial carbon cycling in the LPJ dynamic global vegetation model, *Global Change Biology*, 9, 161-185, 10.1046/j.1365-2486.2003.00569.x, 2003.
- Smith, B.: LPJ-GUESS – an ecosystem modelling framework (Unpublished), <https://api.semanticscholar.org/CorpusID:173988543>, 2007.
- Wohlfahrt, G. and Gu, L.: The many meanings of gross photosynthesis and their implication for photosynthesis research from leaf to globe, *Plant, Cell & Environment*, 38, 2500-2507, <https://doi.org/10.1111/pce.12569>, 2015.
- Wong, S. C., Cowan, I. R., and Farquhar, G. D.: Stomatal conductance correlates with photosynthetic capacity, *Nature*, 282, 424-426, 10.1038/282424a0, 1979.
- Zani, D., Crowther, T. W., Mo, L., Renner, S. S., and Zohner, C. M.: Increased growing-season productivity drives earlier autumn leaf senescence in temperate trees, *Science*, 370, 1066-1071, 10.1126/science.abd8911, 2020.
- zanid90: zanid90/AutumnPhenology: Autumn Phenology repository [dataset], 10.5281/zenodo.4058162, 2021.
