# Supplementary material for: Process-oriented models of autumn leaf phenology: ways to sound calibration and implications of uncertain projections
Source: Copernicus journal article supplement (doi:10.5194/gmd-16-7171-2023), 2023-12-11
Supplement: Supplementary file 7 [file gmd-16-7171-2023-supplement.zip]

Archive with 7 entries (7 files):
- gmd-16-7171-2023-supplement-title-page.pdf
- Meier2023_SupplementS4_ProcessOrientedModelsOfAutumnLeafPhenology.pdf
- Meier2023_SupplementS3_ProcessOrientedModelsOfAutumnLeafPhenology.pdf
- Meier2023_SupplementS5_ProcessOrientedModelsOfAutumnLeafPhenology.pdf
- Meier2023_SupplementS2_ProcessOrientedModelsOfAutumnLeafPhenology.pdf
- Meier2023_SupplementS6_ProcessOrientedModelsOfAutumnLeafPhenology.pdf
- Meier2023_SupplementS1_ProcessOrientedModelsOfAutumnLeafPhenology.pdf
